# Supplementary material
Source: MDPI journal article supplement (https://www.mdpi.com/2079-8954/10/4/89)
Supplement: s1 [file s1]

**Supplemental Table S1.** Simulated Combo10 death rate reduction over time relative to the base run for the six top interventions tested individually, 2020-2050 (supporting Figure 2).

| Simulation        | HP2030 goal basis | Death types averted due to intervention                         | Combo10 death rate per 100,000 adults |       |       |       | Percent change from baseline |       |       |       |
|-------------------|-------------------|-----------------------------------------------------------------|---------------------------------------|-------|-------|-------|------------------------------|-------|-------|-------|
|                   |                   |                                                                 | 2025                                  | 2030  | 2040  | 2050  | 2025                         | 2030  | 2040  | 2050  |
| Baseline          |                   |                                                                 | 341.3                                 | 361.8 | 388.4 | 411.1 |                              |       |       |       |
| SmokePrev_adult23 | TU-02             | Diab, CVD, Colo Ca, Breast Ca, Respir Ca, Oral Ca, Asthma, COPD | 340.1                                 | 359.1 | 382.5 | 402.4 | -0.4%                        | -0.7% | -1.5% | -2.1% |
| DPP18             | D-01              | Diabetes, CVD, Colo Ca, Breast Ca                               | 340.2                                 | 359.5 | 383.9 | 404.7 | -0.3%                        | -0.6% | -1.2% | -1.6% |
| SmokeQuit16.5     | TU-14             | Diab, CVD, Colo Ca, Breast Ca, Respir Ca, Oral Ca, Asthma, COPD | 340.4                                 | 359.9 | 384.4 | 405.3 | -0.3%                        | -0.5% | -1.0% | -1.4% |
| BPmgmt25          | HDS-05            | Hypertension, CVD                                               | 338.6                                 | 358.7 | 384.6 | 406.9 | -0.8%                        | -0.9% | -1.0% | -1.0% |
| PA_adult11        | PA-02             | Diab, Hyptn, CVD, Colo Ca, Breast Ca, Asthma, COPD              | 340.9                                 | 360.8 | 386.0 | 407.7 | -0.1%                        | -0.3% | -0.6% | -0.8% |
| CRCscreen26.5     | C-07              | Colo Ca                                                         | 340.5                                 | 360.3 | 386.6 | 409.2 | -0.2%                        | -0.4% | -0.5% | -0.5% |

Key: \* "Combo10" first-listed causes of death: Diabetes, hypertension, CVD, asthma, COPD, and 5 types of cancer.

\* SmokePrev\_adult23: Smoking prevention (adults) intervention with dose of 23%.

\* DPP18: Diabetes prevention program with dose of 18%.

\* SmokeQuit16.5: Smoking quit services intervention with dose of 16.5%.

\* BPmgmt25: BP management intervention with dose of 25%.

\* PA\_adult11: Physical activity (adults) intervention with dose of 11%.

\* CRCscreen26.5: Colorectal cancer screening intervention with dose of 26.5%.

\* All interventions start Jan2020, ramped up to indicated dose by Jan20
